# Supplementary material for: Earth microbial co-occurrence network reveals interconnection pattern across microbiomes
Source: PubMed Central journal article supplement (PMC7273686; doi:10.1186/s40168-020-00857-2), 2020-06-04
Supplement: 40168_2020_857_MOESM4_ESM.pdf [file 40168_2020_857_MOESM4_ESM.pdf]

## Supporting Materials

### Earth microbial co-occurrence network reveals interconnection pattern across microbiomes

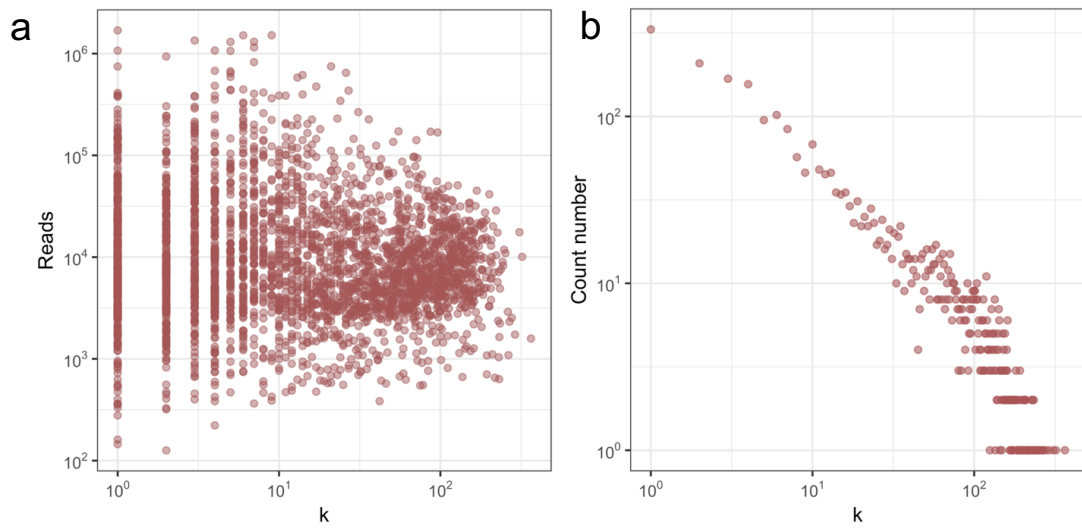

Figure S1. The degree distribution of Earth microbial co-occurrence network. (a) Relationship between degree and the read counts of corresponding ESVs. (b) The scale free distribution of degree of nodes.

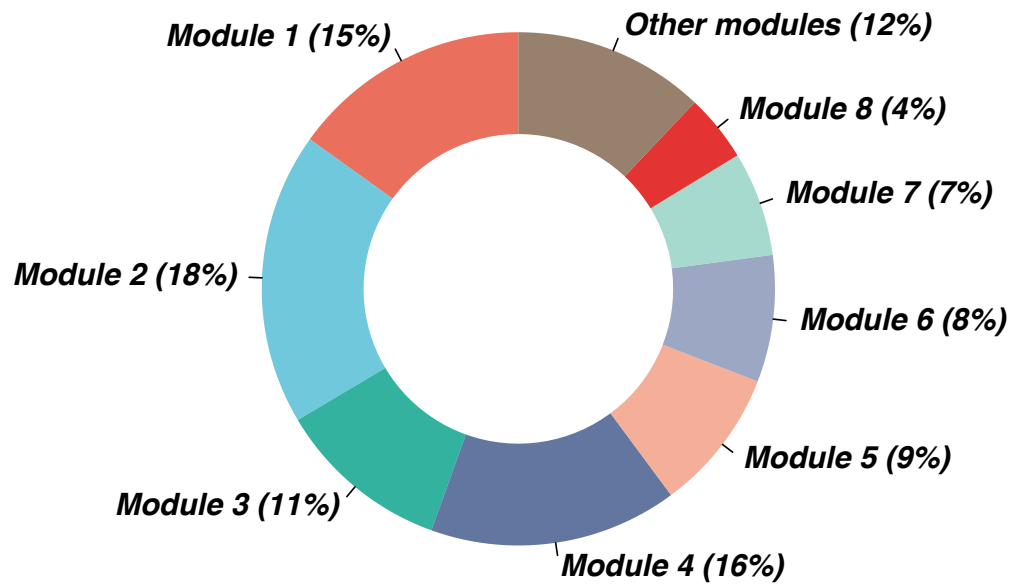

Figure S2. The relative abundance of vertices in 8 modules of the Earth microbial co-occurrence network.

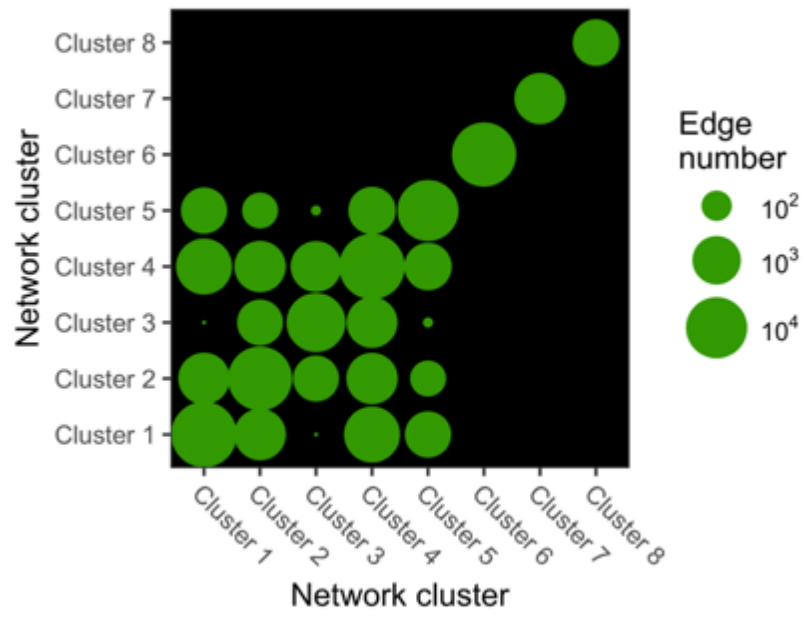

Figure S3. The linkage across 8 modules of the Earth microbial co-occurrence network.

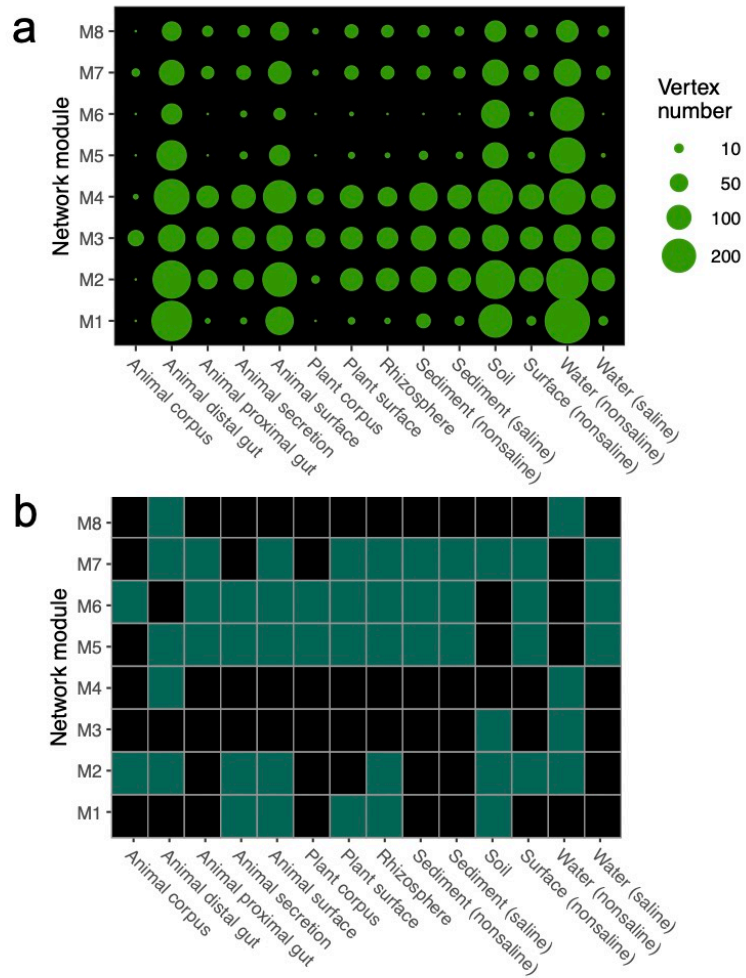

Figure S4. The distribution of vertices from subnetworks for 14 environmental types among 8 dominant modules. (a) Abundance profiles of vertex from 14 environmental type in 8 modules. (b) Overrepresentation of environmental types in 8 modules.

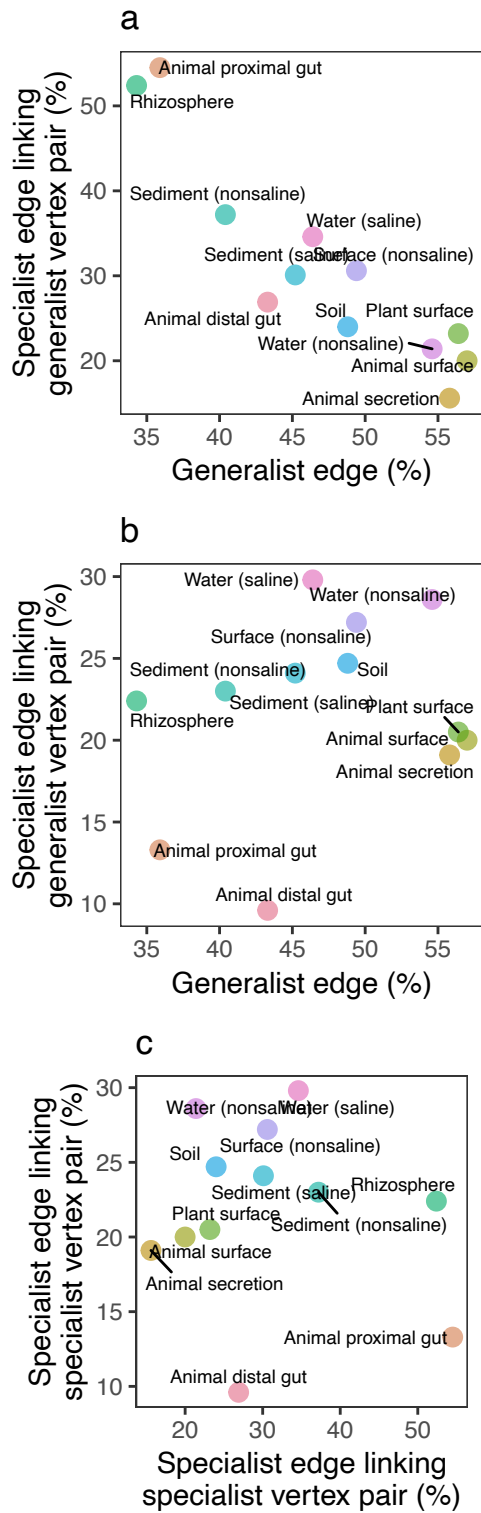

Figure S5. Relationships between proportions of (a) generalist edge and specialist edge linking generalist vertex pair, (b) generalist edge and specialist edge linking specialist vertex pair, and (c) specialist edge linking generalist vertex pair and specialist vertex pair.

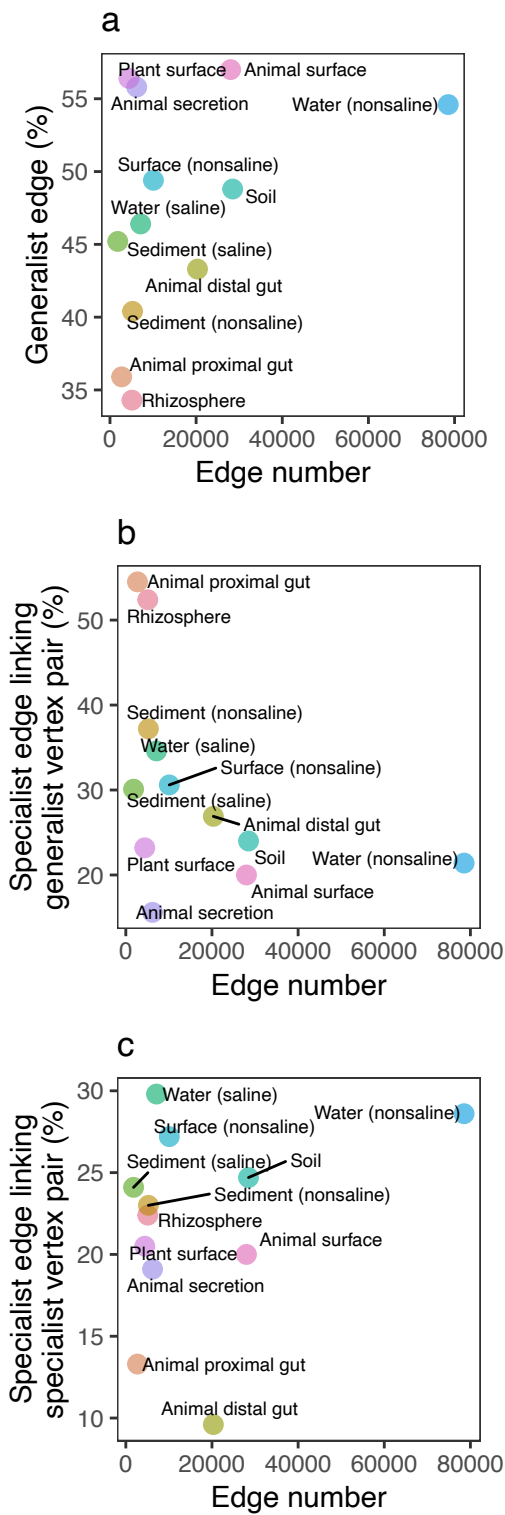

Figure S6. Relationship between edge number and (a) the proportion of generalist edge, (b) specialist edge linking generalist vertex pair, and (c) specialist edge linking specialist vertex pair.

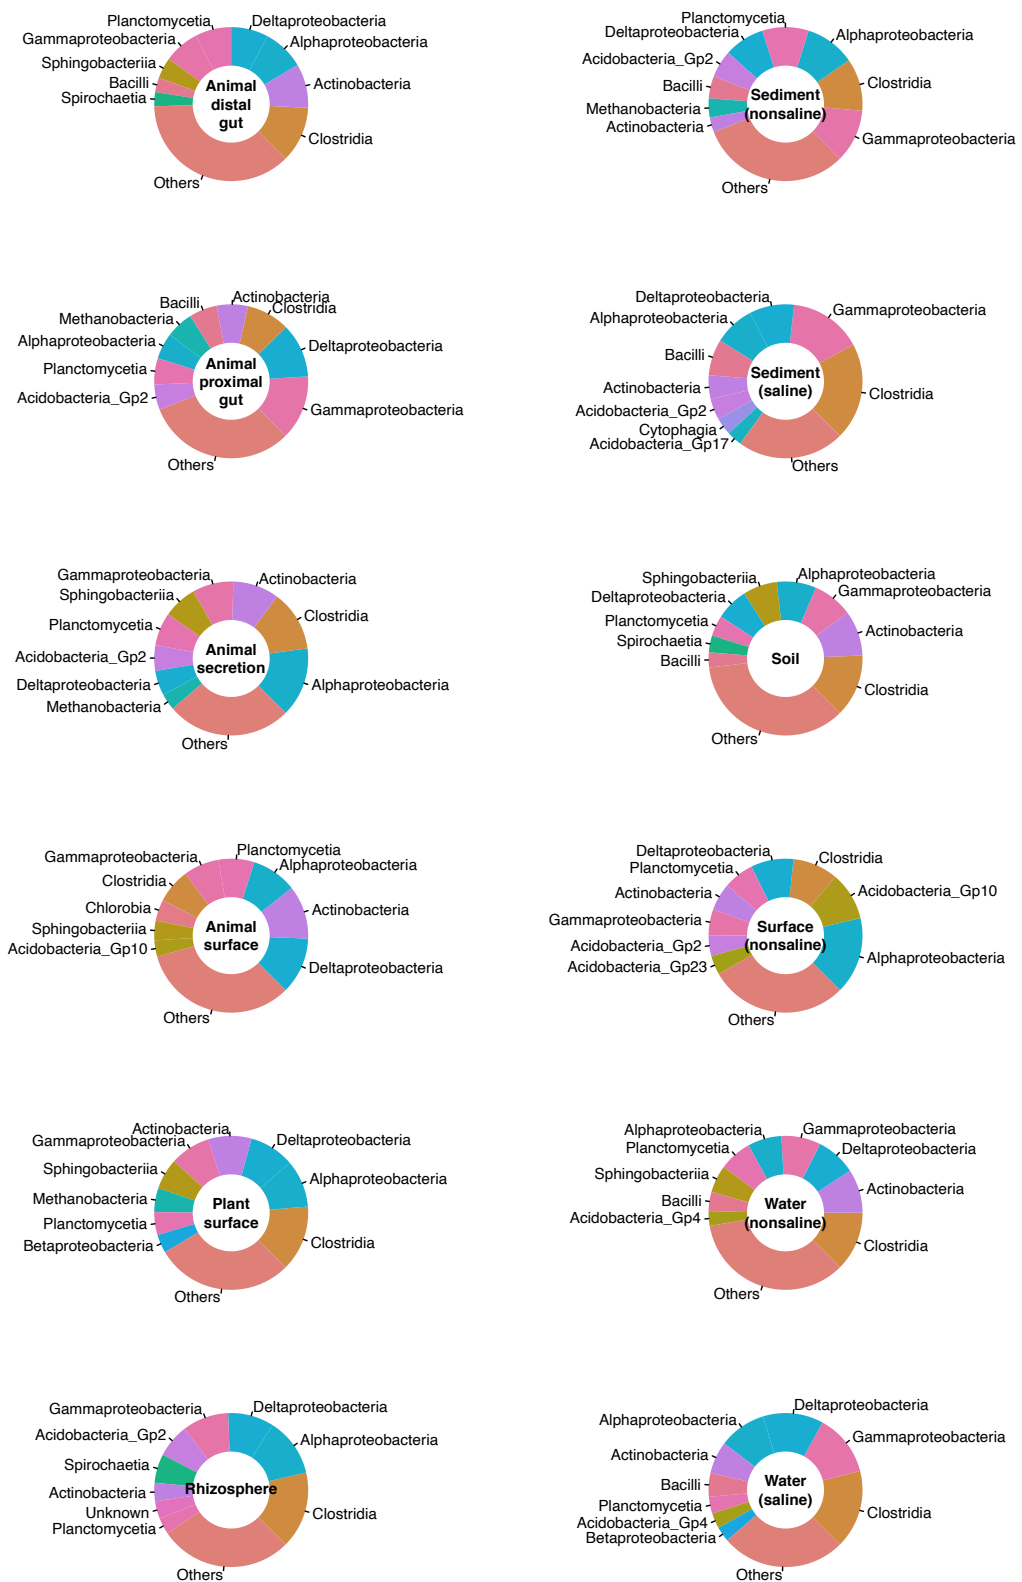

Figure S7. Taxon profiles of generalist edge linked vertices in subnetworks of 12 environments inferred from trimmed datasets

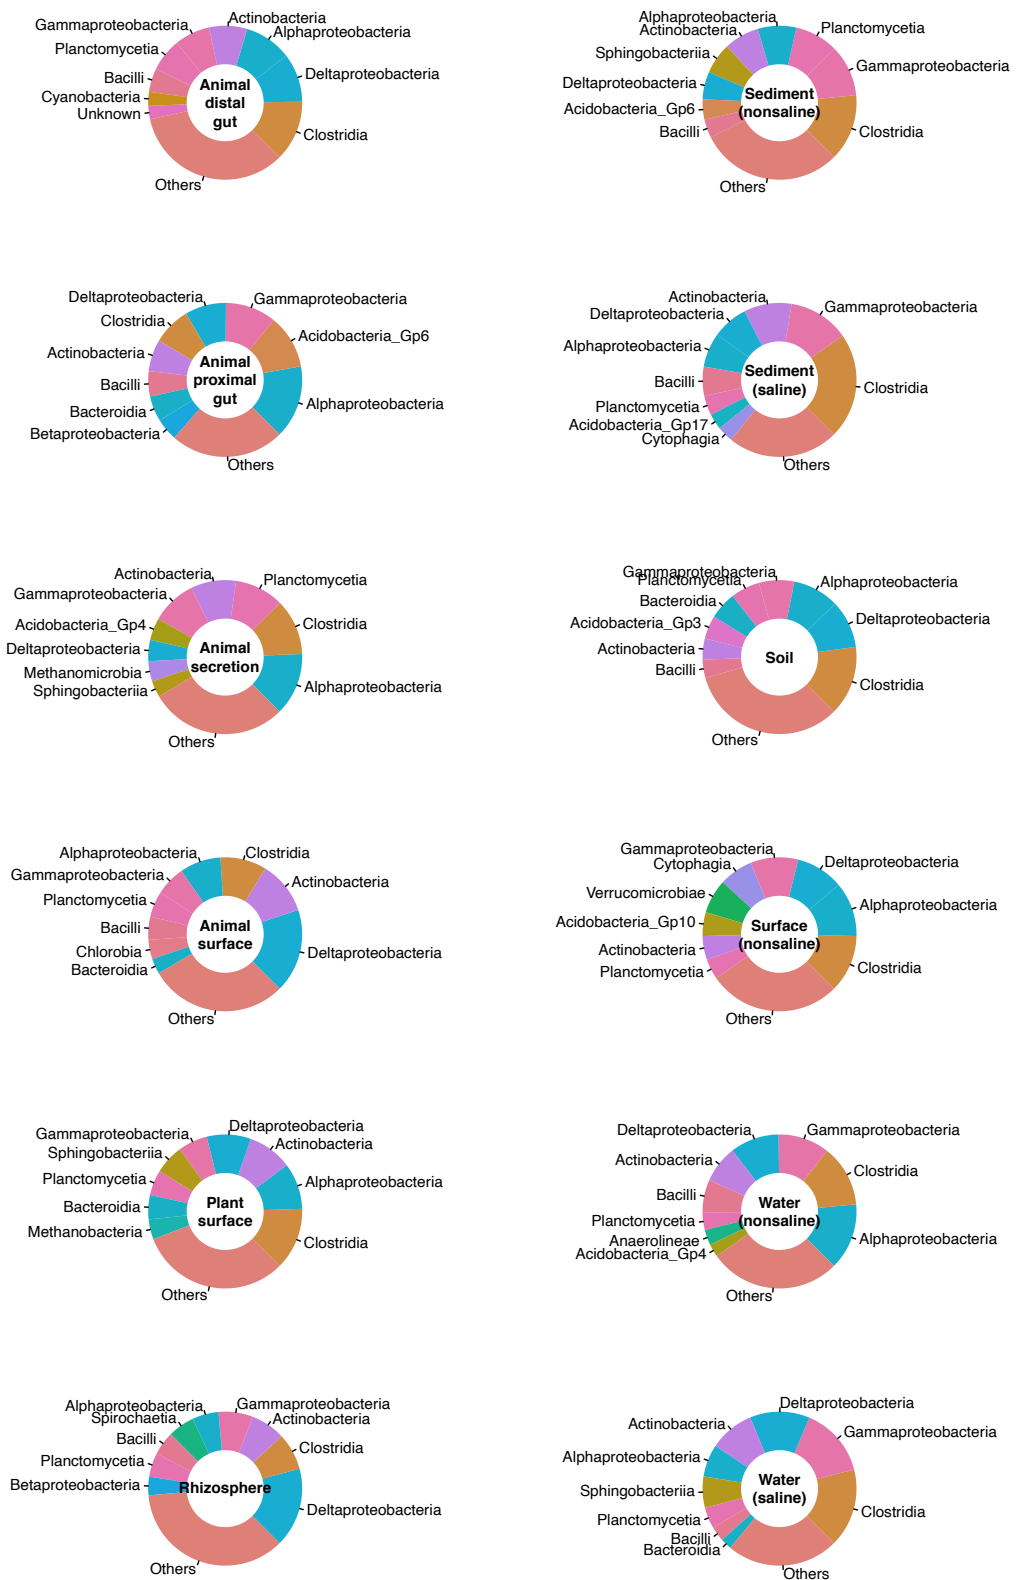

Figure S8. Taxon profiles of specialist edge linking generalist vertex pair linked vertices in subnetworks of 12 environments inferred from trimmed datasets



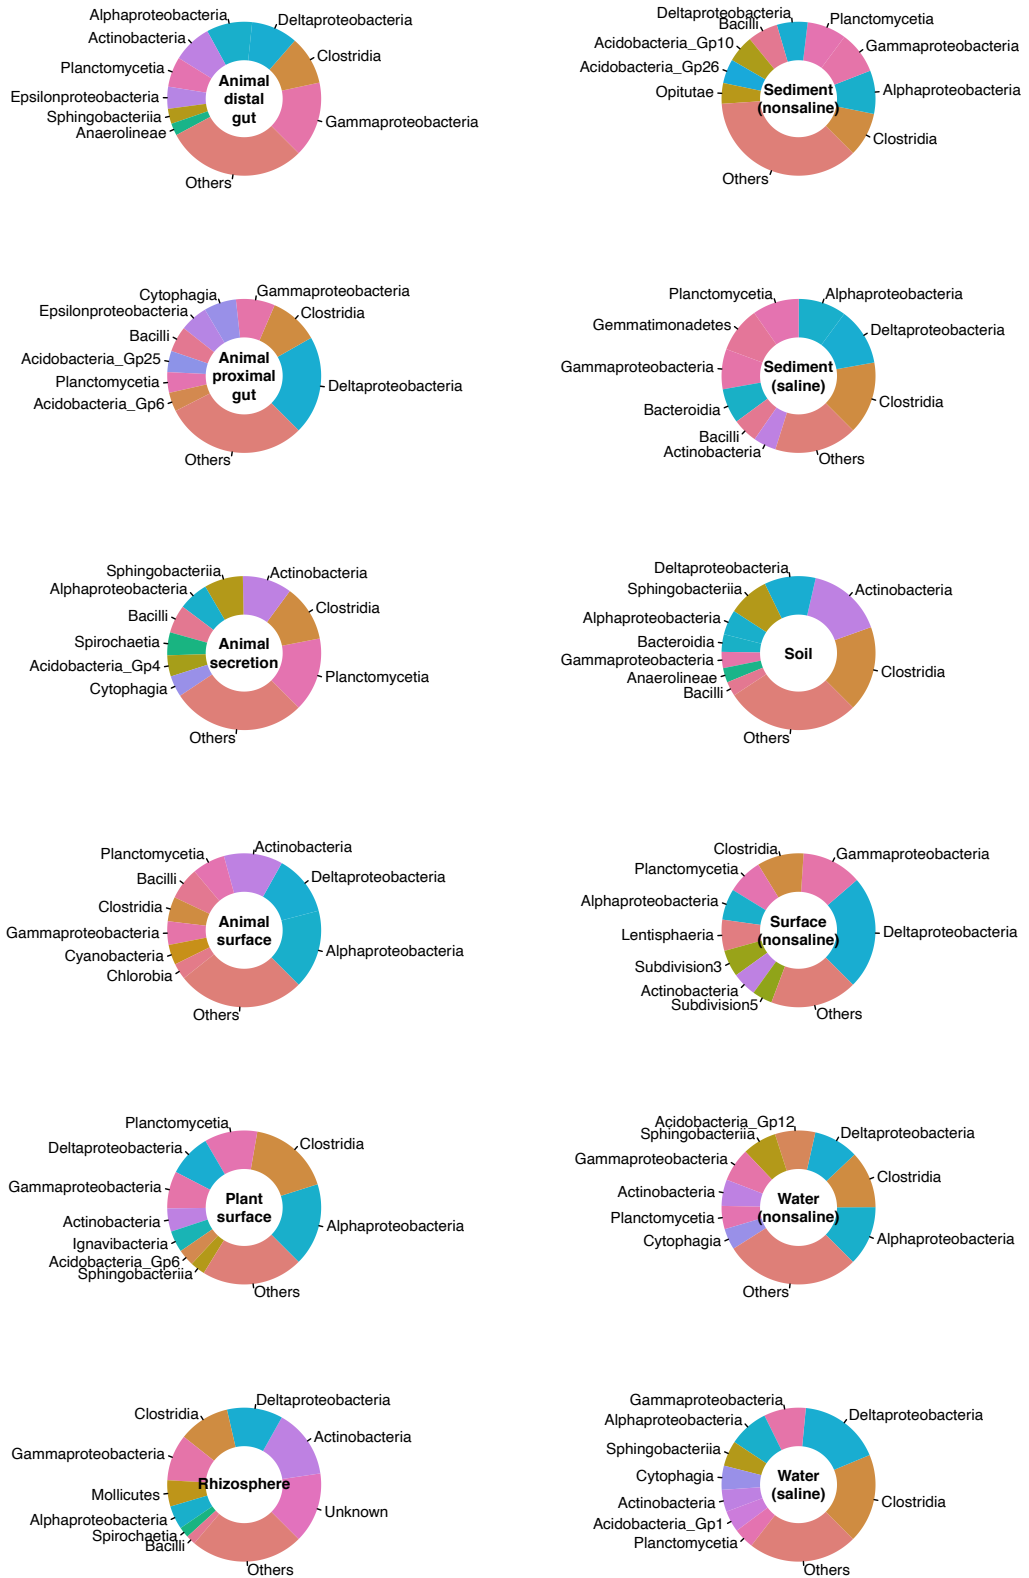

Figure S9. Taxon profiles of specialist edge linking specialist vertex pair linked vertices in subnetworks of 12 environments inferred from trimmed datasets

**Table S1. The size of subnetworks and sample numbers for 14 environmental categories at level-3 of the EMP ontology.**

| <b>Environment</b>   | <b>EVS number</b> | <b>Edge number</b> | <b>Sample number</b> |
|----------------------|-------------------|--------------------|----------------------|
| Water (nonsaline)    | 2820              | 15201              | 4914                 |
| Animal distal gut    | 2253              | 1179               | 4157                 |
| Soil                 | 2092              | 2259               | 4278                 |
| Animal surface       | 1322              | 2241               | 2960                 |
| Sediment (nonsaline) | 639               | 472                | 543                  |
| Plant surface        | 497               | 464                | 1610                 |
| Surface (nonsaline)  | 493               | 1209               | 1270                 |
| Water (saline)       | 481               | 1024               | 679                  |
| Sediment (saline)    | 462               | 122                | 558                  |
| Animal secretion     | 449               | 524                | 1256                 |
| Rhizosphere          | 422               | 966                | 553                  |
| Animal proximal gut  | 406               | 316                | 366                  |
| Plant corpus         | 209               | 141                | 124                  |
| Animal corpus        | 87                | 226                | 327                  |
